# Supplementary material for: Association of β-Blocker Use With Heart Failure Hospitalizations and Cardiovascular Disease Mortality Among Patients With Heart Failure With a Preserved Ejection Fraction: A Secondary Analysis of the TOPCAT Trial
Source: PubMed Central journal article supplement (PMC6902757; doi:10.1001/jamanetworkopen.2019.16598), 2019-12-04
Supplement: jamanetwopen-2-e1916598-s001.pdf [file jamanetwopen-2-e1916598-s001.pdf]

## Supplementary Online Content

Silverman DN, Plante TB, Infeld M, et al. Association of  $\beta$ -blocker use with heart failure hospitalizations and cardiovascular disease mortality among patients with heart failure with a preserved ejection fraction: a secondary analysis of the TOPCAT trial. *JAMA Netw Open*. 2019;2(12):e1916598.  
doi:10.1001/jamanetworkopen.2019.16598

**eTable 1.** Sensitivity Analysis, Hazard Ratios for Heart Failure Hospitalizations by Ejection Fraction Among Those Not Changing Baseline Beta-Blocker Status During Follow-up

**eTable 2.** Sensitivity Analysis, Hazard Ratios for Heart Failure Hospitalizations by Ejection Fraction Among Those Not Changing Baseline Beta-Blocker Status During Follow-up Using the Propensity Score Matched Cohort

**eTable 3.** Baseline Characteristics of Propensity Score Matched Patients That Did Not Change Baseline Beta-Blocker Status During Follow-up

**eTable 4.** Beta-blocker Utilization in Contemporary HFpEF Cohorts

**eTable 5.** Median and Interquartile Ranges for BNP and NT-proBNP Levels

**eTable 6.** Hazard Ratios for Cardiovascular Disease Mortality by Ejection Fraction

**eFigure 1.** Cumulative Incidence Plot for Cardiovascular Disease Mortality by Beta-Blocker Use in Patients With an EF  $\geq$ 50%

**eFigure 2.** Quartile Ranges of BNP and NT-proBNP Levels by Beta-Blocker Use

This supplementary material has been provided by the authors to give readers additional information about their work.

**eTable 1.** Sensitivity Analysis, Hazard Ratios for Heart Failure Hospitalizations by Ejection Fraction Among Those Not Changing Baseline Beta-Blocker Status During Follow-up\*

|                   | <b>Unadjusted</b> | <b>Minimally Adjusted**</b> | <b>Fully adjusted***</b> |
|-------------------|-------------------|-----------------------------|--------------------------|
| <b>All EF</b>     | 1.66 (1.20, 2.30) | 1.54 (1.11, 2.15)           | 1.55 (1.11, 2.17)        |
| <b>EF &lt;50%</b> | 0.53 (0.23, 1.21) | 0.51 (0.22, 1.18)           | 0.49 (0.21, 1.17)        |
| <b>EF ≥50%</b>    | 1.90 (1.33, 2.71) | 1.74 (1.21, 2.49)           | 1.76 (1.22, 2.53)        |
| <b>EF ≥55%</b>    | 2.24 (1.47, 3.42) | 2.04 (1.32, 3.12)           | 2.08 (1.35, 3.21)        |
| <b>EF ≥60%</b>    | 2.29 (1.38, 3.78) | 2.07 (1.24, 3.45)           | 2.06 (1.23, 3.47)        |
| <b>EF ≥65%</b>    | 3.09 (1.34, 7.11) | 2.83 (1.20, 6.64)           | 2.68 (1.13, 6.34)        |

\*This analysis excludes the 284 participants who did not receive beta-blockers at baseline who had documented beta-blocker use during medication reconciliation at any follow-up visit (n=103) and those who received beta-blockers at baseline who had follow-up visits at which medication reconciliation documented no beta-blocker use (n=181). We censored at the time of first heart failure hospitalization for these comparisons. The interaction between an EF threshold of 50% and beta-blocker use and incident HF hospitalizations in the fully adjusted model achieved statistical significance ( $p=0.007$ ).

\*Adjusted for age, sex, race/ethnicity, and treatment assignment

\*\* Minimally adjusted model plus prior myocardial infarction, atrial fibrillation, chronic obstructive pulmonary disease, asthma, and hypertension

**eTable 2.** Sensitivity Analysis, Hazard Ratios for Heart Failure Hospitalizations by Ejection Fraction Among Those Not Changing Baseline Beta-Blocker Status During Follow-up Using the Propensity Score Matched Cohort

|                | <b>Hazard Ratios</b> |
|----------------|----------------------|
| <b>All EF</b>  | 1.36 (0.94, 1.97)    |
| <b>EF ≥50%</b> | 1.51 (0.99, 2.29)    |
| <b>EF ≥55%</b> | 1.71 (1.03, 2.83)    |
| <b>EF ≥60%</b> | 2.20 (1.06, 4.57)    |
| <b>EF ≥65%</b> | 2.66 (0.71, 9.93)    |

This analysis excludes participants who did not receive beta-blockers at baseline who had documented beta-blocker use during medication reconciliation at any follow-up visit and those who received beta-blockers at baseline who had follow-up visits at which medication reconciliation documented no beta-blocker use. We censored at the time of first heart failure hospitalization for these comparisons. The interaction between EF and beta-blocker use and incident HF hospitalizations was statistically significant ( $p=0.046$ ). The hazard ratios for patients with an EF 45-49 could not be estimated due to the small number of matched sets.

**eTable 3.** Baseline Characteristics of Propensity Score Matched Patients That Did Not Change Baseline Beta-Blocker Status During Follow-up

|                                                   |                          | Beta Blocker |             | P value* |
|---------------------------------------------------|--------------------------|--------------|-------------|----------|
|                                                   |                          | No           | Yes         |          |
| <b>N</b>                                          |                          | 260          | 640         |          |
| <b>Treatment</b>                                  | N (%) spironolactone     | 133 (51%)    | 323 (50%)   | 0.84     |
| <b>Age</b>                                        | Mean (SD) years          | 73 (10)      | 73 (10)     | 0.92     |
| <b>Sex</b>                                        | N (%) female             | 148 (57%)    | 352 (55%)   | 0.97     |
| <b>Race</b>                                       | N (%) white non-hispanic | 145 (56%)    | 371 (58%)   | 0.88     |
| <b>NYHA class <math>\geq 3</math></b>             | N (%)                    | 90 (35%)     | 222 (35%)   | 0.73     |
| <b>Height</b>                                     | Mean (SD) cm             | 166 (11)     | 165 (11)    | 0.47     |
| <b>Weight</b>                                     | Mean (SD) kg             | 92 (26)      | 92 (25)     | 0.78     |
| <b>BMI</b>                                        | Mean (SD)                | 33.5 (9.2)   | 33.5 (8.1)  | 0.93     |
| <b>Waist</b>                                      | Mean (SD) cm             | 110 (19)     | 108 (17)    | 0.15     |
| <b>HR</b>                                         | Mean (SD) bpm            | 71 (12)      | 70 (11)     | 0.90     |
| <b>SBP</b>                                        | Mean (SD) mmHg           | 129 (16)     | 128 (16)    | 0.89     |
| <b>DBP</b>                                        | Mean (SD) mmHg           | 73 (13)      | 72 (11)     | 0.78     |
| <b>Baseline Medications/ Natriuretic Peptides</b> |                          |              |             |          |
| <b>ACE/ARB/Aliskirin</b>                          | N (%)                    | 205 (79%)    | 486 (76%)   | 0.27     |
| <b>Statin</b>                                     | N (%)                    | 123 (47%)    | 347 (54%)   | 0.95     |
| <b>Other lipid medication</b>                     | N (%)                    | 18 (7%)      | 47 (7%)     | 0.72     |
| <b>Aspirin</b>                                    | N (%)                    | 118 (45%)    | 316 (49%)   | 0.98     |
| <b>Other antiplatelet agent</b>                   | N (%)                    | 20 (8%)      | 52 (8%)     | 0.74     |
| <b>Anticoagulation</b>                            | N (%)                    | 90 (35%)     | 244 (38%)   | 0.61     |
| <b>Thiazide diuretic</b>                          | N (%)                    | 76 (29%)     | 179 (28%)   | 0.99     |
| <b>Loop diuretic</b>                              | N (%)                    | 182(70%)     | 487 (76%)   | 0.51     |
| <b>Other K sparing</b>                            | N (%)                    | 1 (<1%)      | 4 (1%)      | 0.44     |
| <b>CAI diuretic</b>                               | N (%)                    | 0 (0%)       | 1 (<1%)     | 0.48     |
| <b>Any diuretic</b>                               | N (%)                    | 225 (87%)    | 569 (89%)   | 0.80     |
| <b>Ca channel blocker</b>                         | N (%)                    | 119 (46%)    | 270 (42%)   | 0.84     |
| <b>Digoxin</b>                                    | N (%)                    | 32 (12%)     | 79 (12%)    | 0.73     |
| <b>BNP</b>                                        | Mean (SD)                | 307 (226)    | 407 (486)   | 0.10     |
| <b>NT-proBNP</b>                                  | Mean (SD)                | 1787 (2296)  | 1807 (2159) | 0.77     |
| <b>BNP quartile</b>                               | N(%) 1                   | 17 (19%)     | 61 (23%)    | 0.13     |
|                                                   | N(%) 2                   | 32 (36%)     | 62 (24%)    |          |
|                                                   | N(%) 3                   | 23 (26%)     | 75 (29%)    |          |
|                                                   | N(%) 4                   | 18 (20%)     | 65 (25%)    |          |
| <b>NT-proBNP quartile</b>                         | N(%) 1                   | 10 (19%)     | 25 (17%)    | 0.31     |
|                                                   | N(%) 2                   | 11 (21%)     | 39 (27%)    |          |
|                                                   | N(%) 3                   | 18 (34%)     | 27 (19%)    |          |
|                                                   | N(%) 4                   | 14 (26%)     | 54 (37%)    |          |

| <b>Past Medical History</b>                                                 |           |            |            |      |
|-----------------------------------------------------------------------------|-----------|------------|------------|------|
| <b>MI</b>                                                                   | N (%)     | 27 (10%)   | 80 (13%)   | 0.83 |
| <b>Angina</b>                                                               | N (%)     | 44 (17%)   | 124 (19%)  | 0.99 |
| <b>Stroke</b>                                                               | N (%)     | 26 (10%)   | 48 (8%)    | 0.19 |
| <b>COPD</b>                                                                 | N (%)     | 53 (20%)   | 120 (19%)  | 0.94 |
| <b>Asthma</b>                                                               | N (%)     | 37 (14%)   | 85 (13%)   | 0.90 |
| <b>HTN</b>                                                                  | N (%)     | 220 (85%)  | 560 (88%)  | 0.87 |
| <b>PAD</b>                                                                  | N (%)     | 23 (9%)    | 52 (8%)    | 0.58 |
| <b>Dyslipidemia</b>                                                         | N (%)     | 152 (58%)  | 405 (63%)  | 0.96 |
| <b>Atrial fibrillation</b>                                                  | N (%)     | 100 (38%)  | 278 (43%)  | 0.56 |
| <b>Thyroid</b>                                                              | N (%)     | 50 (19%)   | 124 (19%)  | 0.86 |
| <b>Diabetes mellitus</b>                                                    | N (%)     | 96 (37%)   | 250 (39%)  | 0.92 |
| <b>Smoking</b>                                                              | N (%)     | 20 (8%)    | 37 (6%)    | 0.33 |
| <b>CABG</b>                                                                 | N (%)     | 24 (9%)    | 71 (11%)   | 0.93 |
| <b>PCI</b>                                                                  | N (%)     | 31 (12%)   | 84 (13%)   | 0.84 |
| <b>ICD</b>                                                                  | N (%)     | 3 (1%)     | 19 (3%)    | 0.17 |
| <b>Pacemaker</b>                                                            | N (%)     | 43 (17%)   | 97 (15%)   | 0.81 |
| <b>EF</b>                                                                   | Mean (SD) | 59.2 (7.7) | 58.7 (7.9) | 0.73 |
| <b>EF &gt;50%</b>                                                           | N (%)     | 236 (91%)  | 571 (89%)  | 0.71 |
| <b>EF &gt;55%</b>                                                           | N (%)     | 201 (77%)  | 479 (75%)  | 0.60 |
| <b>EF &gt;60%</b>                                                           | N (%)     | 143 (55%)  | 317 (50%)  | 0.21 |
| <b>EF &gt;65%</b>                                                           | N (%)     | 69 (27%)   | 177 (28%)  | 0.53 |
| <b>Outcomes</b>                                                             |           |            |            |      |
| <b>HF hospitalization</b>                                                   | N (%)     | 41 (16%)   | 147 (23%)  | 0.04 |
| <b>CVD death</b>                                                            | N (%)     | 33 (13%)   | 87 (14%)   | 0.71 |
| <b>MI</b>                                                                   | N (%)     | 10 (4%)    | 31 (5%)    | 0.67 |
| <b>Stroke</b>                                                               | N (%)     | 6 (2%)     | 25 (4%)    | 0.26 |
| <b>* Cochran-Mantel-Haenszel chi square test for categorical variables;</b> |           |            |            |      |
| <b>conditional logistic regression for continuous variables</b>             |           |            |            |      |

Baseline characteristics of the propensity score matched cohort of patients that did not change their beta-blocker status during follow-up. ACE-I, Angiotensin Converting Enzyme Inhibitor; ARB, Angiotensin Receptor Blocker; BMI, body mass index; CABG, Coronary Artery Bypass Grafting; CAI, Carbonic anhydrase Inhibitor; COPD, Chronic Obstructive Pulmonary Disease; DBP, diastolic blood pressure; EF, Ejection Fraction; HR, Heart Rate, HTN, Hypertension; ICD, Implantable Cardioverter Defibrillator; K, Potassium; MI, Myocardial Infarction; NYHA, New York Heart Association; PAD, Peripheral Artery Disease; PCI, Percutaneous Coronary Intervention.

**eTable 4.** Beta-blocker Utilization in Contemporary HFpEF Cohorts

| Study                                | Treatment Arms                    | Major Endpoints                           | Inclusion Criteria         | Mean EF | Baseline beta-blocker use |
|--------------------------------------|-----------------------------------|-------------------------------------------|----------------------------|---------|---------------------------|
| <b>CHARM-P<br/>2003 (n=3,023)</b>    | Candesartan<br>Placebo            | CV Mortality<br>HF Hospitalization        | LVEF >40%<br>NYHA II-IV    | 54%     | <b>56%</b>                |
| <b>PEP-CHF<br/>2006 (n=850)</b>      | Perindopril<br>Placebo            | All-cause Mortality<br>HF Hospitalization | Clinical DHF               | 65%     | <b>54%</b>                |
| <b>I-PRESERVE<br/>2008 (n=4,128)</b> | Irbesartan<br>Placebo             | All-cause Mortality<br>CV Hospitalization | LVEF ≥45%<br>NYHA II-IV    | 60%     | <b>59%</b>                |
| <b>RELAX<br/>2013 (n= 216)</b>       | Sildenafil<br>Placebo             | Change in Peak<br>VO <sub>2</sub> on CPET | LVEF ≥50%<br>NYHA II-IV    | 60%     | <b>76%</b>                |
| <b>TOPCAT<br/>2014 (n=3,445)</b>     | Spirolonactone<br>Placebo         | CV Mortality, RSD<br>HF Hospitalization   | LVEF ≥45%,<br>clinical DHF | 56%     | <b>79%</b>                |
| <b>NEAT-HFpEF<br/>2015 (n=110)</b>   | Isosorbide mononitrate<br>Placebo | Exercise Capacity<br>QOL measure          | LVEF ≥50%<br>NYHA II-III   | 63%     | <b>70%</b>                |
| <b>INDIE-HFpEF<br/>2018 (n=105)</b>  | Inorganic nitrate<br>Placebo      | Peak Oxygen<br>consumption                | LVEF ≥50%,<br>clinical DHF | 61%     | <b>63%</b>                |
| <b>PARAGON-HF<br/>2018 (n=4,822)</b> | Sacubitril/Valsartan<br>Valsartan | CV Mortality<br>HF Hospitalization        | LVEF ≥45%<br>NYHA II-IV    | 58%     | <b>80%</b>                |

CHARM-P, Candesartan in Heart Failure Assessment of Reduction in Mortality and Morbidity-Preserved; CPET, cardiopulmonary exercise test; CV, cardiovascular; DHF, diastolic heart failure; HF, heart failure; INDIE-HFpEF, Inorganic Nitrite Delivery to Improve Exercise Capacity in Heart Failure With Preserved Ejection Fraction; I-PRESERVE, Irbesartan in Heart Failure With Preserved Ejection Fraction; EF, left ventricular ejection fraction; NEAT-HFpEF, Nitrate's Effect on Activity Tolerance in Heart Failure with Preserved Ejection Fraction; PARAGON-HF, Prospective Comparison of ARNI with ARB Global Outcomes in HF With Preserved Ejection Fraction; PEP-CHF, Perindopril in Elderly People With Chronic Heart Failure; RSD, resuscitated sudden death; QOL, quality of life

**eTable 5.** Median and Interquartile Ranges for BNP and NT-proBNP Levels

|                  | All EFs           |                   |         | EF <50%             |                   |         | EF ≥50%           |                   |         |
|------------------|-------------------|-------------------|---------|---------------------|-------------------|---------|-------------------|-------------------|---------|
|                  | No Beta-blocker   | Beta-Blocker      | p-value | No Beta-blocker     | Beta-Blocker      | p-value | No Beta-blocker   | Beta-Blocker      | p-value |
| <b>BNP</b>       | 205<br>(139-326)  | 273<br>(153-475)  | 0.001   | 240<br>(234-298)    | 364<br>(249-516)  | 0.14    | 198<br>(138-331)  | 261<br>(150-465)  | 0.002   |
| <b>NT-proBNP</b> | 889<br>(621-1694) | 972<br>(554-2148) | 0.20    | 1839<br>(1380-7333) | 967<br>(526-1630) | 0.01    | 847<br>(551-1520) | 989<br>(554-2213) | 0.03    |

Median (IQR) of BNP and NT-proBNP by beta-blocker use at baseline in the entire population and stratified by an EF threshold of 50%. P-values compare log-transformed BNP or NT-proBNP values at baseline by beta-blocker use.

**eTable 6.** Hazard Ratios for Cardiovascular Disease Mortality by Ejection Fraction

|                   | <b>Unadjusted</b> | <b>Minimally Adjusted*</b> | <b>Fully adjusted**</b> |
|-------------------|-------------------|----------------------------|-------------------------|
| <b>All EF</b>     | 1.08 (0.77, 1.50) | 1.11 (0.80, 1.56)          | 1.16 (0.82, 1.62)       |
| <b>EF &lt;50%</b> | 0.69 (0.30, 1.58) | 0.67 (0.28, 1.62)          | 0.62 (0.25, 1.58)       |
| <b>EF ≥50%</b>    | 1.14 (0.79, 1.64) | 1.21 (0.84, 1.76)          | 1.24 (0.85, 1.79)       |

\*Adjusted for age, sex, race/ethnicity, and treatment assignment

\*\*Minimally adjusted model plus prior myocardial infarction, atrial fibrillation, chronic obstructive pulmonary disease, asthma, and hypertension

Hazard ratios for cardiovascular disease mortality for beta-blocker use at baseline versus no beta-blocker use at baseline.



**eFigure 1.** Cumulative Incidence Plot for Cardiovascular Disease Mortality by Beta-Blocker Use in Patients With an EF  $\geq 50\%$

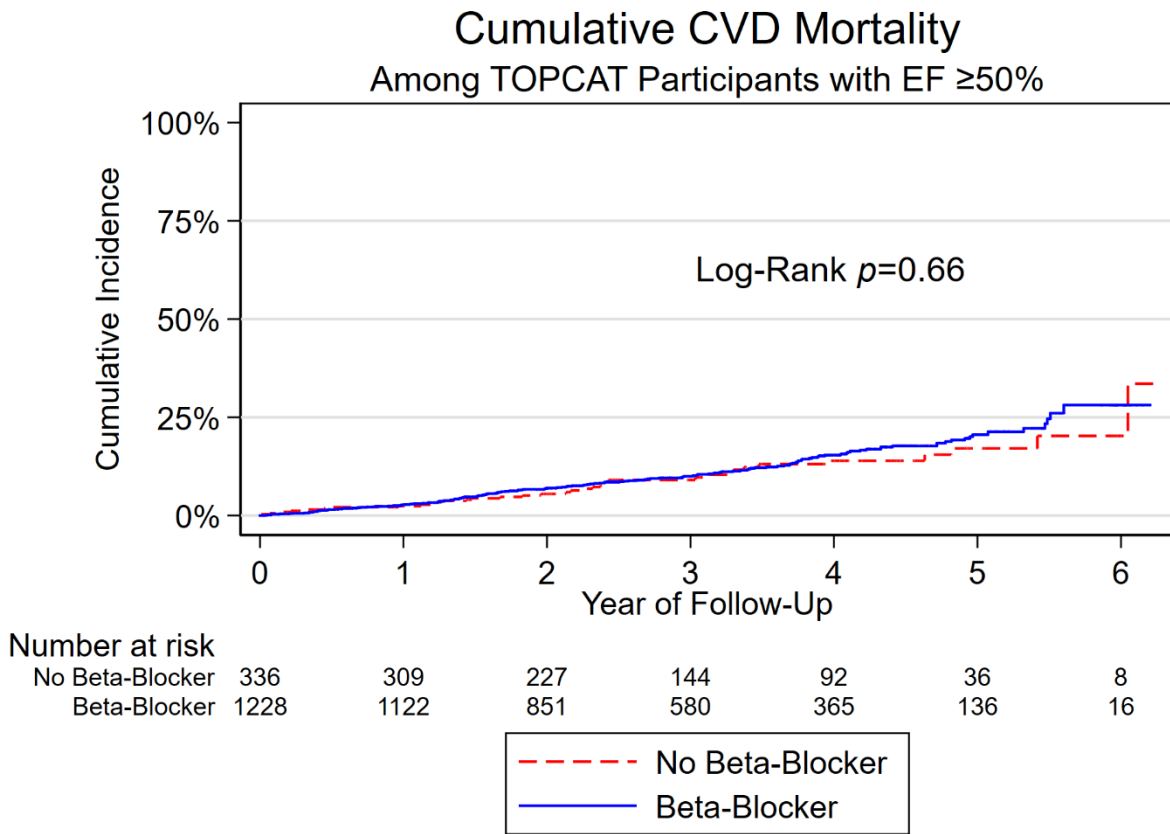

Kaplan Meier plots for CVD mortality by beta-blocker use at baseline stratified by an ejection fraction  $\geq 50\%$ .

**eFigure 2.** Quartile Ranges of BNP and NT-proBNP Levels by Beta-Blocker Use

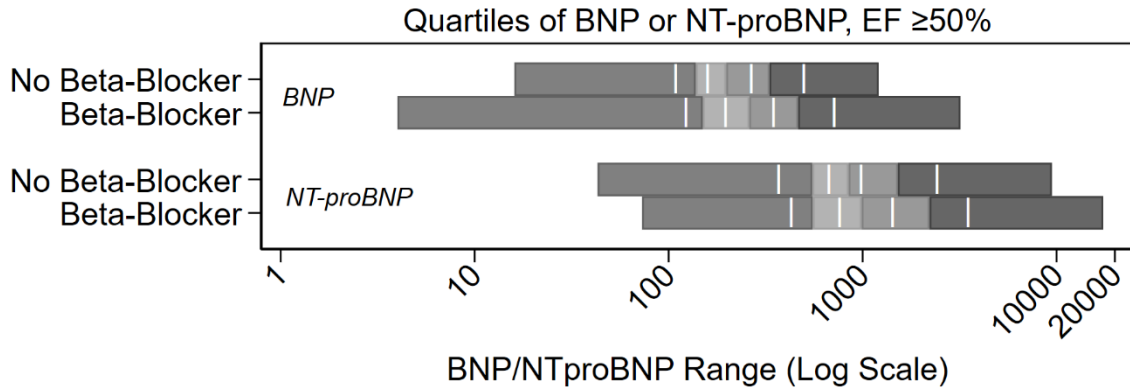

Baseline brain natriuretic peptide (BNP) and N-terminal proBNP (NT-proBNP) levels by beta-blocker at baseline use in patients with an EF  $\geq$ 50%. Midpoints of the quartiles are indicated by vertical lines.
